# Supplementary material for: Surgery on primary tumor shows survival benefit in selected stage IV colon cancer patients: A real-world study based on SEER database
Source: PubMed Central journal article supplement (PMC7150453; doi:10.7150/jca.43518), 2020-03-15
Supplement: jcav11p3567s1.pdf [file jcav11p3567s1.pdf]

Supplemental Table 1. propensity score-matching analyses based on different metastatic sites

| Metastatic site | Before PSM                |                                   | P      | After PSM                 |                                   | P     |
|-----------------|---------------------------|-----------------------------------|--------|---------------------------|-----------------------------------|-------|
|                 | SPT<br>No. of patient (%) | Non-surgery<br>No. of patient (%) |        | SPT<br>No. of patient (%) | Non-surgery<br>No. of patient (%) |       |
| <b>Liver</b>    |                           |                                   | <0.001 |                           |                                   | 1.000 |
| Yes             | 2927 (69.7%)              | 3722 (81.1%)                      |        | 2927 (77.1%)              | 2927 (77.1%)                      |       |
| No/NA           | 1273 (30.3%)              | 869 (18.9%)                       |        | 869 (22.9%)               | 869 (22.9%)                       |       |
| <b>Lung</b>     |                           |                                   | <0.001 |                           |                                   | 1.000 |
| Yes             | 629 (15.0%)               | 1327 (28.9%)                      |        | 629 (16.2%)               | 629 (16.2%)                       |       |
| No/NA           | 3571 (85.0%)              | 3264 (71.1%)                      |        | 3264 (83.8%)              | 3264 (83.8%)                      |       |
| <b>Bone</b>     |                           |                                   | <0.001 |                           |                                   | 1.000 |
| Yes             | 101 (2.4%)                | 337 (7.3%)                        |        | 101 (2.4%)                | 101 (2.4%)                        |       |
| No/NA           | 4099 (97.6%)              | 4254 (92.7%)                      |        | 4099 (97.6%)              | 4099 (97.6%)                      |       |
| <b>Brain</b>    |                           |                                   | <0.001 |                           |                                   | 1.000 |
| Yes             | 40 (1.0%)                 | 86 (1.9%)                         |        | 40 (1.0%)                 | 40 (1.0%)                         |       |
| No/NA           | 4160 (99.0%)              | 4505 (98.1%)                      |        | 4160 (99.0%)              | 4160 (99.0%)                      |       |

PSM: propensity score-matching.
